# Supplementary material
Source: HighWire-hosted journal article supplement (https://bmjopen.bmj.com/content/13/11/e071847)
Supplement: inline-supplementary-material-3 [file inline-supplementary-material-3.pdf]

## Visueel overzicht van aanbeveling

## Populatie

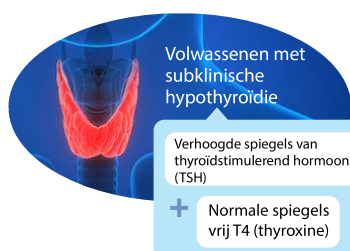

## Inclusief:

- ✓ Patiënten zonder symptomen (gediagnosticeerd na screening)
- ✓ Patiënten met niet-specifieke symptomen

## Is mogelijk niet van toepassing op:

- ? Patiënten met ernstige symptomen
- ? Jongvolwassenen (<30j)

## Niet van toepassing op:

- ✗ Vrouwen die zwanger zijn of met zwangerschapswens
- ✗ Patiënten met TSH meer dan 20 mIU/L

## Vergeleken interventies

Geen schildklierhormonen

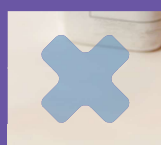

of

Schildklierhormonen  
Levothyroxine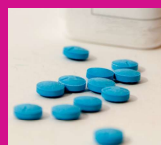

## Aanbeveling

Sterk

Zwak

Zwak

Sterk

Wij raden schildklierhormoontherapie af voor patiënten met subklinische hypothyroïdie.

## Vergelijking van voordelen en nadelen

Deze samenvatting toont alle evidentie geïncorporeerd in de systematische review. Bekijk de online versie voor gedetailleerde samenvattingen van de evidentie voor ouderen (ouder dan 65 jaar) en jongere mensen.

|                                    | Geen schildklierhormonen | Geen belangrijk verschil                   | Schildklierhormonen |
|------------------------------------|--------------------------|--------------------------------------------|---------------------|
| Na 1 jaar                          |                          |                                            |                     |
| Algemene levenskwaliteit           | 0.85                     | EQ-5D score: -0.59-1 (Hoger beter)         | 0.83                |
|                                    |                          | Geen belangrijk verschil                   | ★★★★ Hoog           |
|                                    |                          | Gemiddelde score: 0-100 (Lager beter)      |                     |
| Schildklier-gerelateerde symptomen | 16.7                     | Geen belangrijk verschil                   | 16.5                |
|                                    |                          | Geen belangrijk verschil                   | ★★★★ Hoog           |
| Vermoeidheid/moeheid               | 28.6                     | Geen belangrijk verschil                   | 29.0                |
|                                    |                          | Geen belangrijk verschil                   | ★★★★ Hoog           |
|                                    |                          | Gemiddelde score: 0-21 (Lager beter)       |                     |
| Depressieve symptomen              | 3.3                      | Geen belangrijk verschil                   | 3.6                 |
|                                    |                          | Geen belangrijk verschil                   | ★★★★ Hoog           |
| Na 1,5 jaar                        |                          |                                            |                     |
| Cognitieve functies                | 27.1                     | Gemiddelde score: 0-oneindig (Hoger beter) | 28.1                |
|                                    |                          | Geen belangrijk verschil                   | ★★★★ Hoog           |
| Na 2 jaar                          |                          |                                            |                     |
|                                    |                          | Gebeurtenis per 1000 mensen                |                     |
| Mortaliteit*                       | 14                       | Geen belangrijk verschil                   | 27                  |
|                                    |                          | Geen belangrijk verschil                   | ★★★★ Laag           |
| Cardiovasculaire events*           | 54                       | Geen belangrijk verschil                   | 48                  |
|                                    |                          | Geen belangrijk verschil                   | ★★★★ Laag           |
|                                    |                          | Gemiddelde score: 0-100 (Lager beter)      |                     |
| Nevenwerkingen                     | 10.3                     | Geen belangrijk verschil                   | 10.9                |
|                                    |                          | Geen belangrijk verschil                   | ★★★★ Matig          |

\* Slechts enkele overlijdens werden opgemerkt, in een enkele trial. Voor mortaliteit zijn we 95% zeker dat het verschil ligt tussen 5 minder tot 62 meer sterfgevallen per 1000 patiënten die levothyroxine gebruiken. Voor cardiovasculaire events zijn we 95% zeker dat het verschil ligt tussen 28 minder tot 62 meer events per 1000 patiënten die levothyroxine gebruiken.

## Voornaamste praktische zaken

## Schildklierhormonen

Gedurende lange termijn regelmatig consultaties en bloedstalen om hormoonspiegel te monitoren

Dagelijkse orale medicatie, normaal gezien tabletten, vaak langdurige behandeling

Overdosis kan leiden tot symptomen van hyperthyroïdie

Zou 4 uur ingenomen moeten worden voor producten die calcium of ijzer bevatten

## Geen schildklierhormonen

Regelmatige consultaties en bloedstalen om progressie of resolutie te monitoren

## TSH-spiegels en symptomen

TSH-spiegels kunnen variëren door stress, voorbijgaande ziekte of met de leeftijd. Verhoogde spiegels worden dus vaak terug normaal zonder behandeling.

Er is geen duidelijke evidentie hoe de symptomen betrouwbaar kunnen worden toegeschreven aan subklinische hypothyroïdie.

## Voorkeuren en waarden

Het panel verwacht weinig variabiliteit in hoe patiënten het gebrek aan voordeel afwegen tegen mogelijke nadelen.

Mogelijke nadelen, en met name het risico op overlijden, kunnen door patiënten anders worden gewaardeerd afhankelijk van hun leeftijd, kwaliteit van leven en comorbiditeiten.

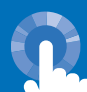

Bekijk een interactieve versie van deze grafiek online

<https://www.bmj.com/content/365/bmj.l2006>

Disclaimer: Deze infografiek is geen gevalideerde klinisch beslissing. Deze informatie is verstrekt zonder enige representaties, voorwaarden of garanties dat ze accuraat of up-to-date is. BMJ en zijn licentiegevers dragen geen verantwoordelijkheid voor elk aspect van de toegediende behandeling met behulp van deze informatie. Elk vertrouwen dat wordt gesteld op deze informatie is strikt op eigen risico van de gebruiker. Voor de volledige disclaimer zie de algemene voorwaarden van BMJ: <https://www.bmj.com/company/legal-information/>

KU LEUVEN

ACADEMISCH CENTRUM  
HUISARTSGENEESKUNDE

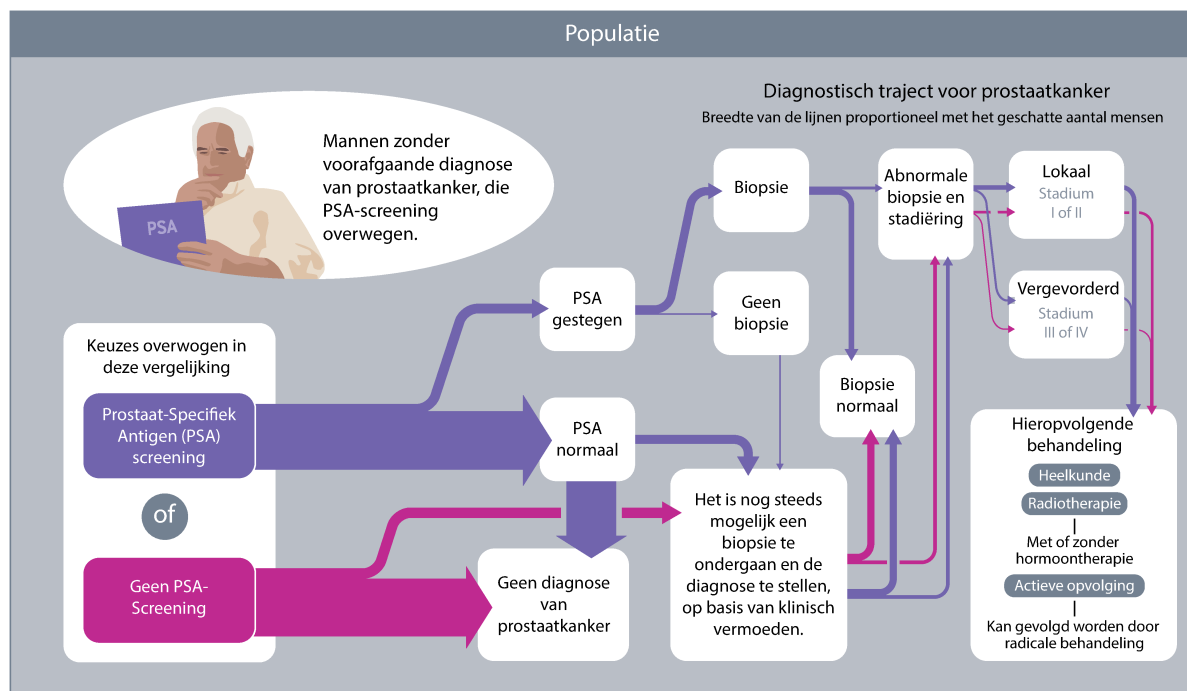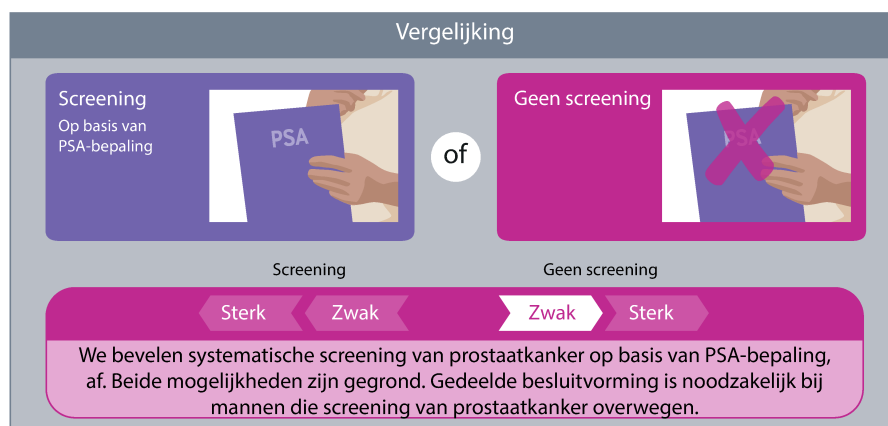

thebmj

Zie interactieve versie van deze infografiek online:

<http://bit.ly/BMJrr>

Van de 1000 mannen met PSA-screening presenteren meer mannen zich met biopsie-gerelateerde complicaties:

Bloed in het sperma: 94

Pijn: 45

Koorts: 19

Bloed in de urine: 67

Hospitalisatie omwille van sepsis: 1

Van de 1000 mannen met PSA-screening presenteren meer mannen zich met behandeling-gerelateerde complicaties:

Erectie niet stijf genoeg voor geslachtsgemeenschap: 25

Urine-incontinentie: 3

**Belangrijkste resultaten – Geselecteerde evidentie, met een lager risico op vooroordelen**

|                                       | Voorkeur voor screening | Geen belangrijk verschil | Voorkeur voor geen screening |                |
|---------------------------------------|-------------------------|--------------------------|------------------------------|----------------|
| <b>Binnen 10 jaar</b>                 |                         |                          |                              |                |
| Mortaliteit (alle oorzaken)           | 129                     | Geen belangrijk verschil | 129                          | ★★★★ Gemiddeld |
| Mortaliteit (prostaatkanker)          | 2                       | 1 minder                 | 3                            | ★★★★ Gemiddeld |
| Incidentie van kanker (alle stadia)   | 50                      | 18 minder                | 32                           | ★★★★ Gemiddeld |
| Incidentie van kanker (lokaal)        | 33                      | 14 minder                | 19                           | ★★★★ Gemiddeld |
| Incidentie van kanker (vergevoerd)    | 10                      | 3 minder                 | 13                           | ★★★★ Gemiddeld |
| <b>Binnen 1 maand</b>                 |                         |                          |                              |                |
| Biopsie-gerelateerde complicaties     |                         | Minder                   |                              | ★★★★ Laag      |
| <b>Te allen tijde</b>                 |                         |                          |                              |                |
| Behandeling-gerelateerde complicaties |                         | Minder                   |                              | ★★★★ Laag      |

Klik hier voor de volledige Engelstalige rapid recommendation: <https://www.bmj.com/content/362/bmj.k3581>

Disclaimer: Deze infografiek is geen gevalideerde klinisch beslissing. Deze informatie is verstrekt zonder enige representaties, voorwaarden of garanties dat ze accuraat of up-to-date is. BMJ en zijn licentiegevers dragen geen verantwoordelijkheid voor elk aspect van de toegediende behandeling met behulp van deze informatie.

Elk vertrouwen dat wordt gesteld op deze informatie is strikt op eigen risico van de gebruiker.

Voor de volledige disclaimer zie de algemene voorwaarden van BMJ: <http://www.bmj.com/company/legal-information/>

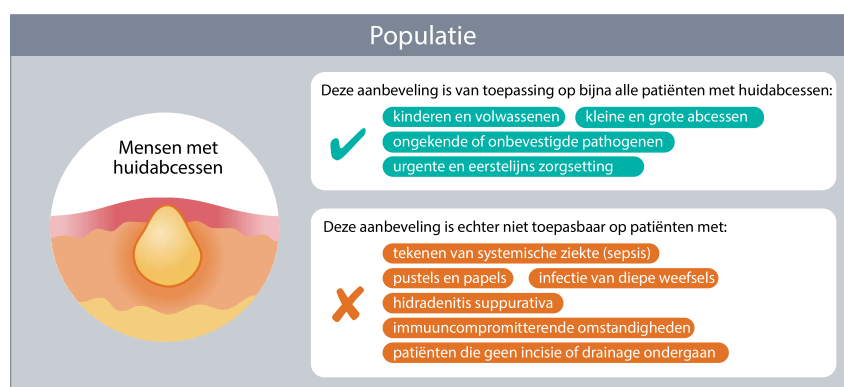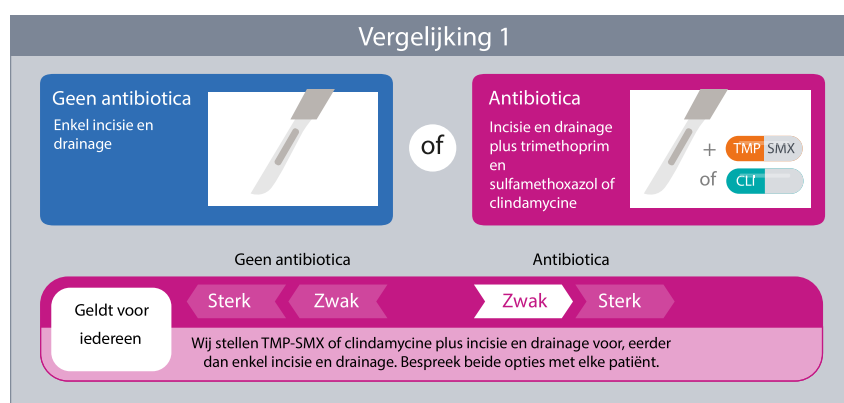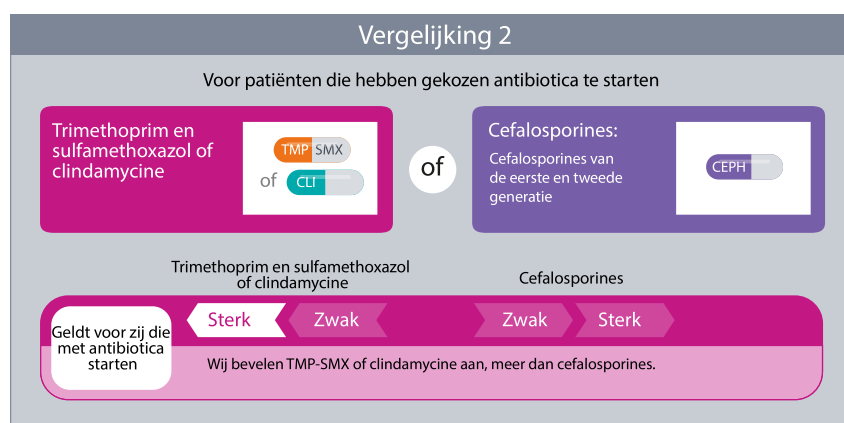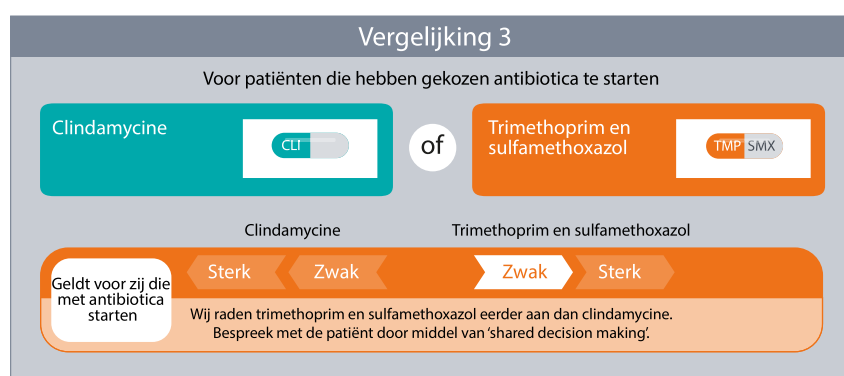

Disclaimer: Deze infografiek is geen gevalideerde klinisch behulp. Deze informatie is verstrekt zonder enige representaties, voorwaarden of garanties dat ze accuraat of up-to-date is. BMJ en zijn licentiegevers dragen geen verantwoordelijkheid voor elk aspect van de toegediende behandeling met behulp van deze informatie. Elk vertrouwen dat wordt gesteld op deze informatie is strikt op eigen risico van de gebruiker. Voor de volledige disclaimer zie de algemene voorwaarden van BMJ: <http://www.bmj.com/company/legal-information/>

thebmj

Zie een interactieve versie van deze infografiek online

<https://www.bmj.com/content/360/bmj.k243>

### Populatie



Mensen met keelpijn

Deze aanbeveling geldt voor haast alle patiënten met keelpijn:

- ✓ Kinderen en volwassenen
- ✓ Ernstige en niet-ernstige keelpijn
- ✓ Spoed en eerstelijns-zorginstellingen
- ✓ Patiënten met een virale of bacteriële keelpijn
- ✓ Patiënten die onmiddellijk of uitgesteld antibiotica krijgen

Desondanks geldt de aanbeveling niet voor patiënten met:

- ✗ Infectieuze mononucleose
- ✗ Immuuncompromitterende aandoeningen
- ✗ Keelpijn volgend op heelkunde of intubatie

### Vergelijking

**Korte kuur met steroïden**

1-2 dosissen van oraal dexamethason (of equivalente dosis van een alternatief corticosteroïd) + standaard zorgen

Volwassenen: 10 mg  
Kinderen: 0.6 mg per kg

+ Standaard zorgen  
+ Analgetica  
+/- Antibiotica

of

**Geen steroïden**

Standaard klinische zorgen, die typisch analgetica bevatten en wellicht ook antibiotica bevatten

Standaard zorgen  
+ Analgetica  
+/- Antibiotica

Geeft voorkeur aan steroïden      Geeft geen voorkeur aan steroïden

Sterk
Zwak
Zwak
Sterk

Wij stellen een korte kuur steroïden voor. Overleg met de patiënt via gedeelde besluitvorming.

#### Vergelijking van de voor- en nadelen

|                                       | Geeft voorkeur aan steroïden | Geen belangrijk verschil | Geeft geen voorkeur aan steroïden | Kwaliteit van evidentie |
|---------------------------------------|------------------------------|--------------------------|-----------------------------------|-------------------------|
| Gevallen per 1000 mensen              |                              |                          |                                   |                         |
| Volledig verdwijnen pijn (24 u)       | 224                          | 124 meer                 | 100                               | ★★★★★ Gemiddeld         |
| Volledig verdwijnen pijn (48 u)       | 608                          | 183 meer                 | 425                               | ★★★★★ Hoog              |
| Gemiddelde tijd tot verdwijnen (uren) |                              |                          |                                   |                         |
| Volledig verdwijnen pijn (48 u)       | 33.0                         | 11.1 minder              | 44.0                              | ★★★★★ Laag              |
| Gevallen per 1000 mensen              |                              |                          |                                   |                         |
| Hervat van symptomen of recidief      | 34                           | Geen belangrijk verschil | 65                                | ★★★★★ Gemiddeld         |
| Antibiotica voorschrijf               | 468                          | 96 minder                | 564                               | ★★★★★ Laag              |

**Voorkeuren en waarden**

Het panel gelooft dat er een grote variabiliteit is in hoeveel reductie in ernst van de pijn of tijd die er nodig is voor volledig verdwijnen van de pijn voor de patiënt als belangrijk wordt ervaren. Gedeelde besluitvorming zou kunnen helpen bewerkstelligen waar elke patiënt het meeste belang aan hecht.

**Ernstige nevenwerkingen**

Toediening van een enkele dosis steroïden zal waarschijnlijk geen ernstige nevenwerkingen veroorzaken. Er bestaat evidentie van zeer lage kwaliteit voor uiterst zeldzame maar ernstige nevenwerkingen volgend op hogere dosissen of langere kuren steroïden (tot 30 dagen).

**Meerdere dosissen**

De risico's zouden de voordelen kunnen overtreffen wanneer cumulatieve dosissen steroïden gegeven worden voor meerdere episodes van keelpijn. Om dit probleem te verzachten, kunnen artsen zo mogelijk de medicatie toedienen op de praktijk of enkel 1 dosis voorschrijven per bezoek.

Klik hier voor de volledige Engelstalige rapid recommendation: <https://www.bmj.com/content/358/bmj.j4090>

Disclaimer: Deze infografiek is geen gevalideerde Minisch beslissing. Deze informatie is verstrekt zonder enige representaties, voorwaarden of garanties dat ze accuraat of up-to-date is. BMJ en zijn licentiegevers dragen geen verantwoordelijkheid voor elk aspect van de toegediende behandeling met behulp van deze informatie. Elk vertrouwen dat wordt gesteld op deze informatie is strikt op eigen risico van de gebruiker. Voor de volledige disclaimer zie de algemene voorwaarden van BMJ: <http://www.bmj.com/company/legal-information/>

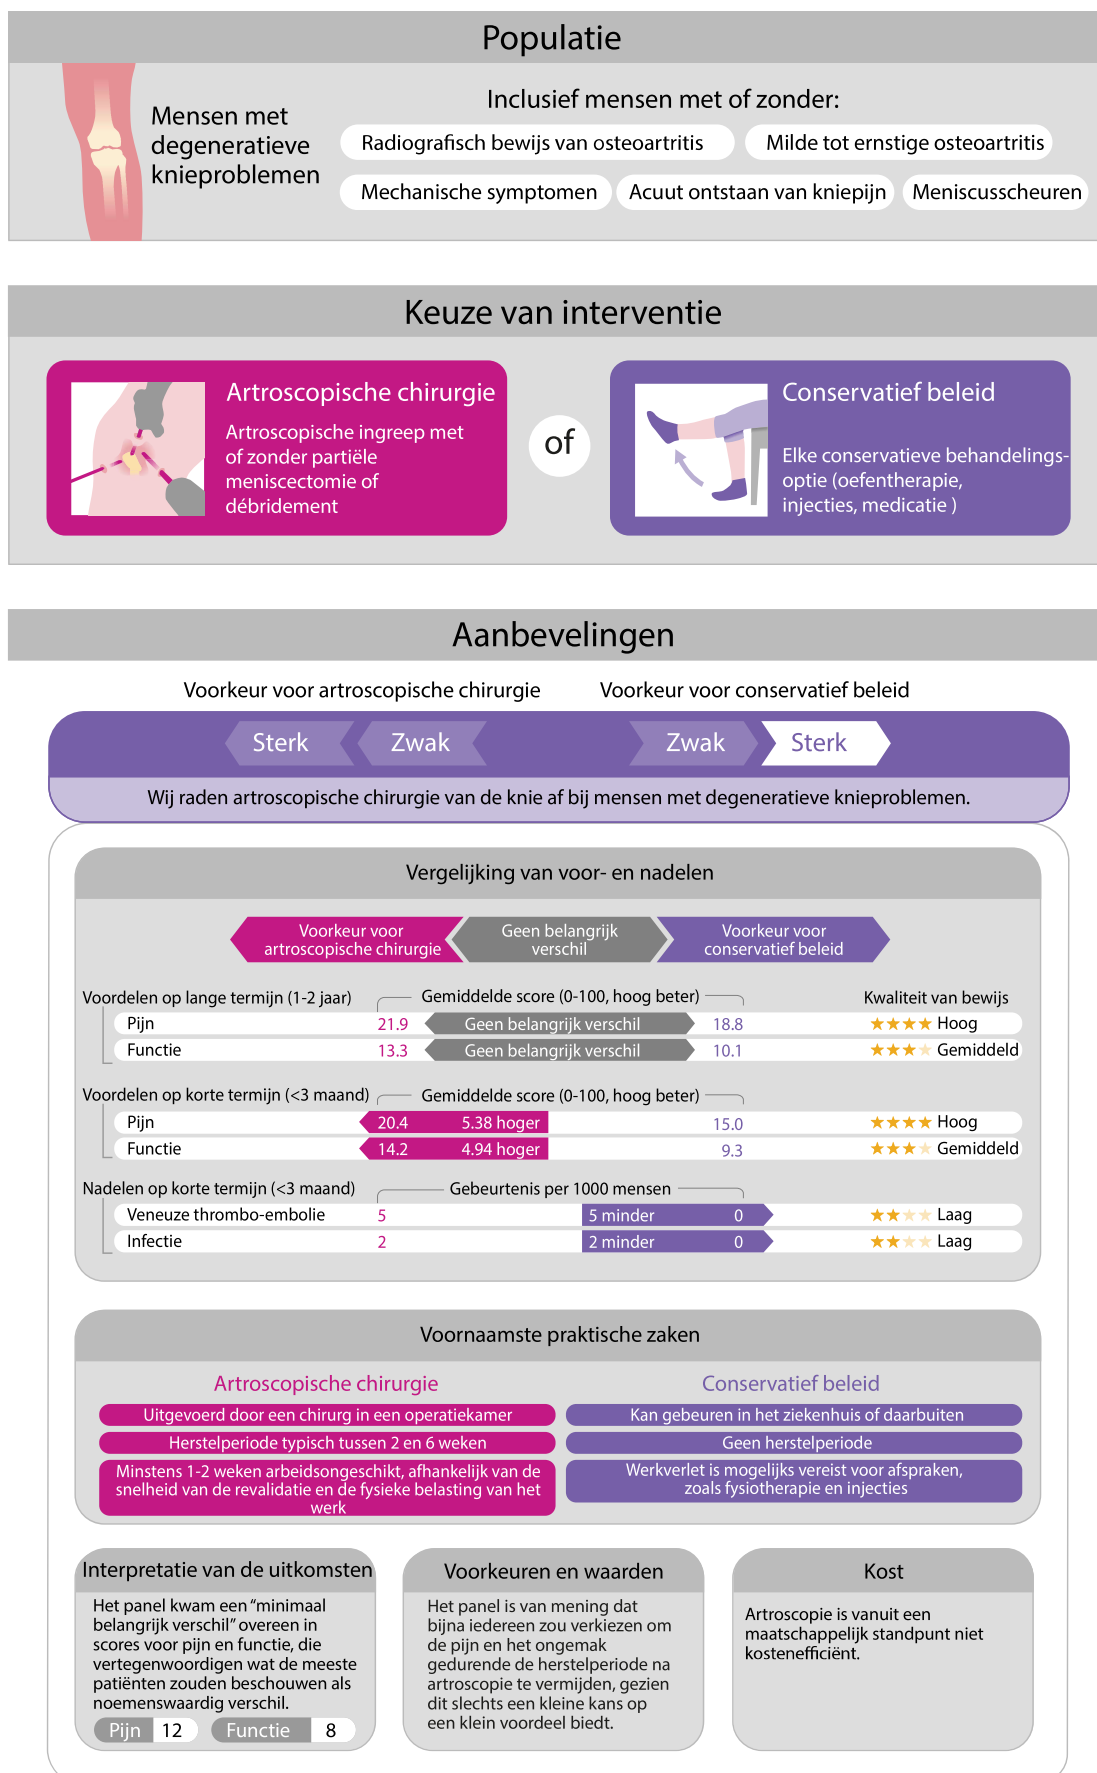

Klik hier voor de volledige Engelstalige rapid recommendation: <https://www.bmj.com/content/357/bmj.j1982>

Disclaimer: Deze infografiek is geen gevalideerde klinisch beschrijving. Deze informatie is verstrekt zonder enige representaties, voorwaarden of garanties dat ze accuraat of up-to-date is. BMJ en zijn licentiegevers dragen geen verantwoordelijkheid voor elk aspect van de toegediende behandeling met behulp van deze informatie. Elk vertrouwen dat wordt gesteld op deze informatie is strikt op eigen risico van de gebruiker. Voor de volledige disclaimer zie de algemene voorwaarden van BMJ: <http://www.bmj.com/company/legal-information/>
