# Supplementary material
Source: HighWire-hosted journal article supplement (https://bmjopen.bmj.com/content/13/11/e071847)
Supplement: inline-supplementary-material-4 [file inline-supplementary-material-4.pdf]

**Supplementary material : List of five fictive clinical scenarios****1. Infographic Thyroid hormones treatment for subclinical hypothyroidism**

A patient visits to discuss her blood results. She did her yearly, complete blood examination last week, as usual. When discussing the results, you discover an elevated TSH. The lady has no symptoms, except for nonspecific complaints such as fatigue and mild gain of weight. How would you go further with this?

**2. Infographic Prostate cancer screening with prostate-specific antigen (PSA) test**

A 55 year old man comes to your consultation for a general blood examination. He has a specific question for a screening for prostate cancer. A colleague at work has had a recent diagnosis of prostate cancer. This really worried him. His colleague was always healthy and needs further treatment now.

**3. Infographic Antibiotics after incision and drainage for uncomplicated skin abscesses**

A 26 year old woman visits you with a skin abscess on her back. She regularly has pimples and scratches them a lot. This time, it did not disappear by itself, but got even bigger and is painful. She heard from a friend that she might need antibiotics and asks you for advice.

**4. Infographic Corticosteroids for sore throat**

A 34 year old lady has sore throat since yesterday. She already had a cold last week and has no fever at this time. She took paracetamol and ibuprofen, but the pain doesn't resolve sufficiently. In 2 days, she has an important presentation at work. She would like something strong so she doesn't experience any more symptoms by that time. Could you describe how you handle this and what is going through your mind?

**5. Infographic Arthroscopic surgery for degenerative knee arthritis and meniscal tears**

A 53 year old man has had knee complaints since a few weeks. He describes his symptoms as 'locking' of the knee while also experiencing a feeling of sagging. You already performed a radiograph and this showed degenerative knee arthritis. The patient read on the website of your local hospital, that he could undergo an arthroscopy for this and he would like to talk to you about it. He arrives in 15 minutes.
